# Supplementary material for: The nucleolar protein GNL3 prevents resection of stalled replication forks
Source: PubMed Central journal article supplement — EMBO Rep. 2023 Nov 15;24(12):e57585. doi: 10.15252/embr.202357585 (PMC10702807; doi:10.15252/embr.202357585), 2023-11-15
Supplement: EMBR-24-e57585-s006.pdf [file EMBR-24-e57585-s006.pdf]

## Expanded View Figures

### Figure EV1. GNL3 prevents DNA resection of stalled replication forks (related to Fig 1).

- A Scheme explaining the mini esiRNA screen to determine the best candidates for further characterization. HCT116 cells were transfected in 96-wells plate with each esiRNA from the library (Dataset EV1). After 48 h cells were treated with 1  $\mu$ M camptothecin for 4 h and subjected to immunofluorescence using an antibody directed against  $\gamma$ H2AX. The level of  $\gamma$ H2AX within nuclei was analyzed using a Celigo high-throughput microscope.
- B The  $\gamma$ H2AX level upon depletion and camptothecin treatment in five biological replicates was used to rank the candidates, GNL3 was ranked first and EGFP (negative control) was ranked at the end of the list (21<sup>st</sup>). The bounds of the box are the 25th and 75th percentiles, the line in the center is the median and the bounds of the whiskers are the maxima and the minima.
- C Graphic representation (related to Fig 1B) of the medians of CldU/IdU ratios in three biological replicates, the average is indicated in red.
- D Western-blot analysis of HeLa S3 cells treated with 1  $\mu$ M camptothecin (CPT) during the indicated time.
- E Western-blot analysis of HeLa S3 cells treated with 10  $\mu$ M etoposide (ETP) during the indicated time.
- F Graphic representation (related to Fig 1D) of the medians of CldU/IdU ratios in three biological replicates, the average is indicated in red.
- G HeLa S3 cells were sequentially labeled for 30 min with IdU and for 30 min with CldU then treated with 1  $\mu$ M CPT for 240 min. The ratio between CldU and IdU is plotted, and the red line indicates the median. For statistical analysis, Mann–Whitney test was used; \*\*\*\* $P$  < 0.0001. At least 100 individual DNA fibers was counted for each condition, the graphic representation of the medians of CldU/IdU ratios in three biological replicates with the average indicated in red is shown.
- H HeLa S3 cells were sequentially labeled for 30 min with IdU and for 30 min with CldU then treated with 10  $\mu$ M ETP for 120 min. The ratio between CldU and IdU is plotted, and the red line indicates the median. For statistical analysis, Mann–Whitney test was used; \*\*\*\* $P$  < 0.0001. At least 100 individual DNA fibers was counted for each condition, the graphic representation of the medians of CldU/IdU ratios in three biological replicates with the average indicated in red is shown.
- I Western-blot analysis of HeLa S3 cells depleted for GNL3, MRE11, CtIP or EXO1.
- J Graphic representation (related to Fig 1E) of the medians of CldU/IdU ratios in three biological replicates, the average is indicated in red.
- K Western-blot analysis of Flp-in T-Rex HeLa cells expressing GNL3-WT tagged with FLAG. Cells were first transfected with siControl or siGNL3 for 48 h then expression of GNL3-WT (resistant to the siRNA against GNL3) was induced using 10  $\mu$ g/ml of doxycycline (DOX) for 16 h.
- L Graphic representation (related to Fig 1F) of the medians of CldU/IdU ratios in three biological replicates, the average is indicated in red.
- M Western-blot analysis of the indicated proteins upon chromatin fractionation of HeLa S3 cells treated 4 h with 5 mM HU.

Source data are available online for this figure.

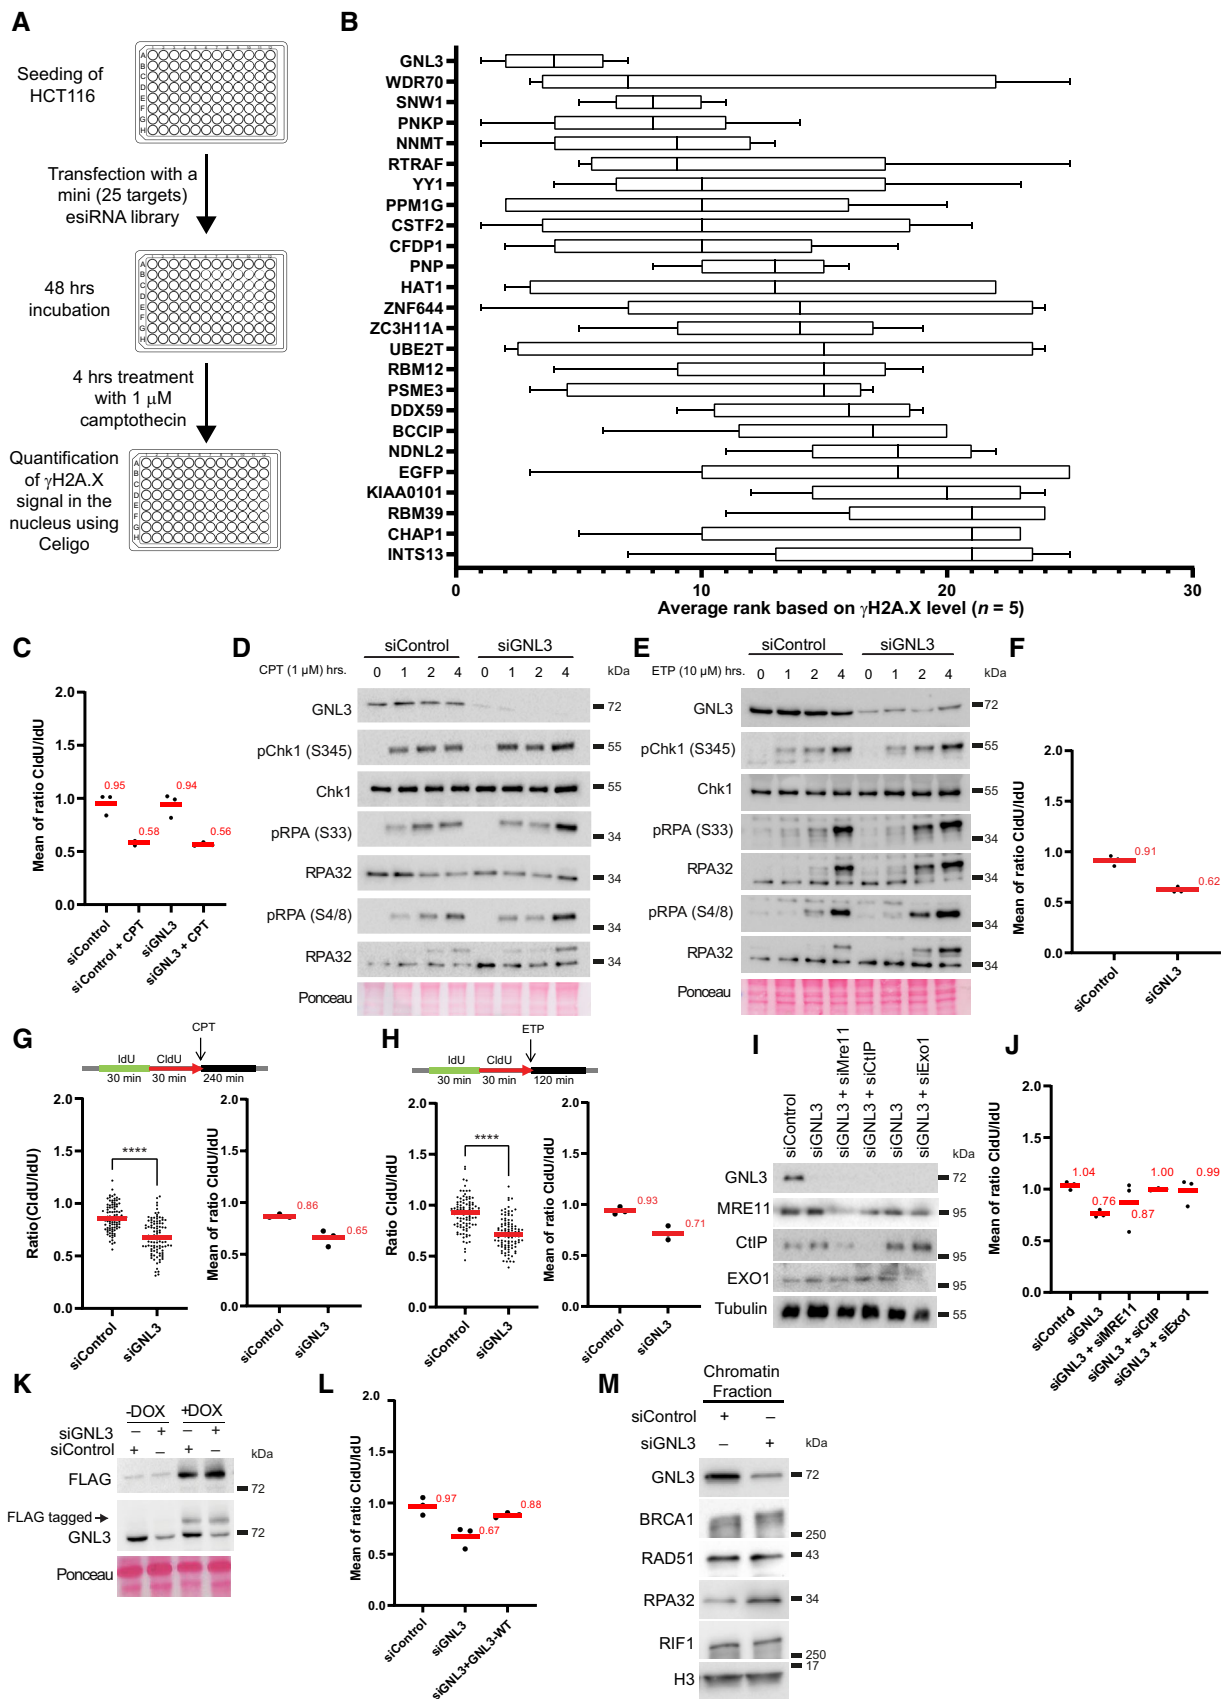

Figure EV1.

**Figure EV2. GNL3 depletion increases the firing of replication origins (related to Fig 2).**

- A Flow cytometry experiment of HeLa S3 cells. Nascent DNA was labeled with IdU and total DNA stained with propidium iodide.
- B Percentage of HeLa S3 cells positive for histone H3 phosphorylated on Histone 10 (pH3S10) upon thymidine block and release. The error bars represent the standard deviation between three biological replicates.
- C Graphic representation (related to Fig 2C) of the average fork velocity in three biological replicates, the average is indicated in red.
- D Quantification of chromatin fractionation based on three biological replicates (related to Fig 2E), the error bars represent the standard deviation.
- E Graphic representation (related to Fig 2F) of the medians of IdU lengths in three biological replicates, the average is indicated in red. Average length of IdU tracts (indicated in red) in three independent experiments. The average value is indicated in red.
- F Loss of RIF1 has effect on replication timing in specific genomic loci. Cells were pulse-labeled with BrdU for 90 min and sorted by flow cytometry in two fractions, S1 and S2, corresponding to early and late S-phase. Neo-synthesized DNA was immunoprecipitated with BrdU antibodies. Early and late neo-synthesized DNAs were labeled with Cy3 and Cy5 and hybridized on microarrays. After processing analyzing with the START-R software, replication-timing profiles can be obtained from two replicates. Shown are the zoomed microarray profiles of the timing of replication on chromosome 1 and chromosome 15 as example. Blue lines represent replication timing from siControl cells and red lines represent siRIF1 cells and gray spots represent the log ratio intensity for each probe of the microarray. Significantly disturbed regions are detected by START-R software and advanced regions are indicated with green line and delayed regions by a pink line.

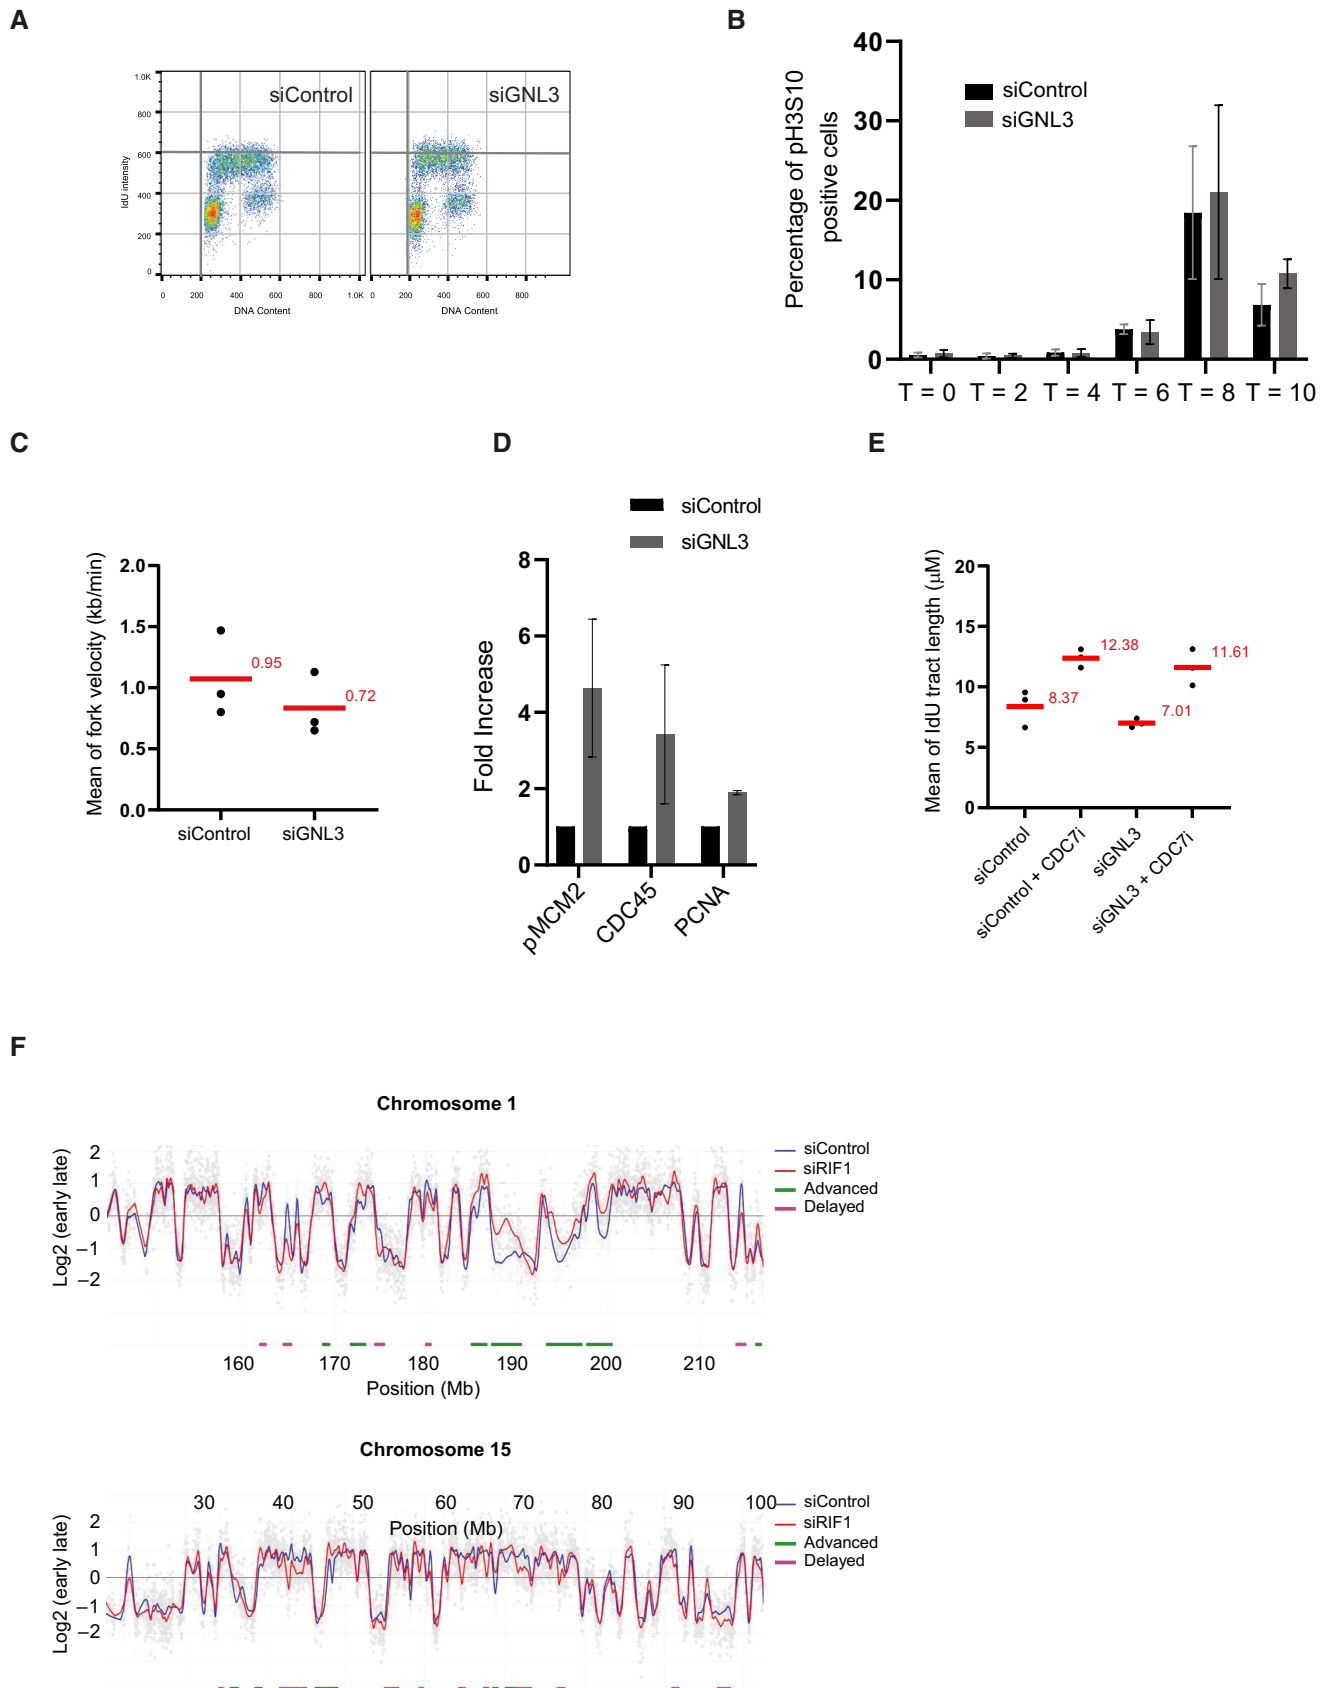

Figure EV2.

**Figure EV3. DNA resection in the absence of GNL3 is a consequence of increased origin firing (related to Fig 3).**

- A Western-blot analysis upon treatment with HU and inhibition of CDC7, WEE1, or ATR.
- B Graphic representation (related to Fig 3B) of the medians of CldU/IdU ratios in three biological replicates, the average is indicated in red.
- C Graphic representation (related to Fig 3C) of the medians of CldU/IdU ratios in three biological replicates, the average is indicated in red.
- D Graphic representation (related to Fig 3D) of the medians of CldU/IdU ratios in three biological replicates, the average is indicated in red.
- E Quantification of RPA phosphorylation (S4/8) upon GNL3 depletion and CDC7 inhibition. The error bars represent the standard deviation between three biological replicates.
- F Western-blot analysis of HeLa S3 cells depleted or not for BRCA1 upon treatment with CDC7 inhibitor.
- G Graphic representation (related to Fig 3F) of the medians of CldU/IdU ratios in three biological replicates, the average is indicated in red.
- H Graphic representation (related to Fig 3G) of the medians of CldU/IdU ratios in three biological replicates, the average is indicated in red.
- I Western-blot analysis of HeLa S3 cells.
- J Graphic representation (related to Fig 3H) of the medians of CldU/IdU ratios in three biological replicates, the average is indicated in red.
- K Western-blot analysis of control U-2 OS cells (U-2 OS) and U-2 OS cells that express the three RPA subunits (SuperRPA).
- L Graphic representation (related to Fig 3I) of the medians of CldU/IdU ratios in three biological replicates, the average is indicated in red.

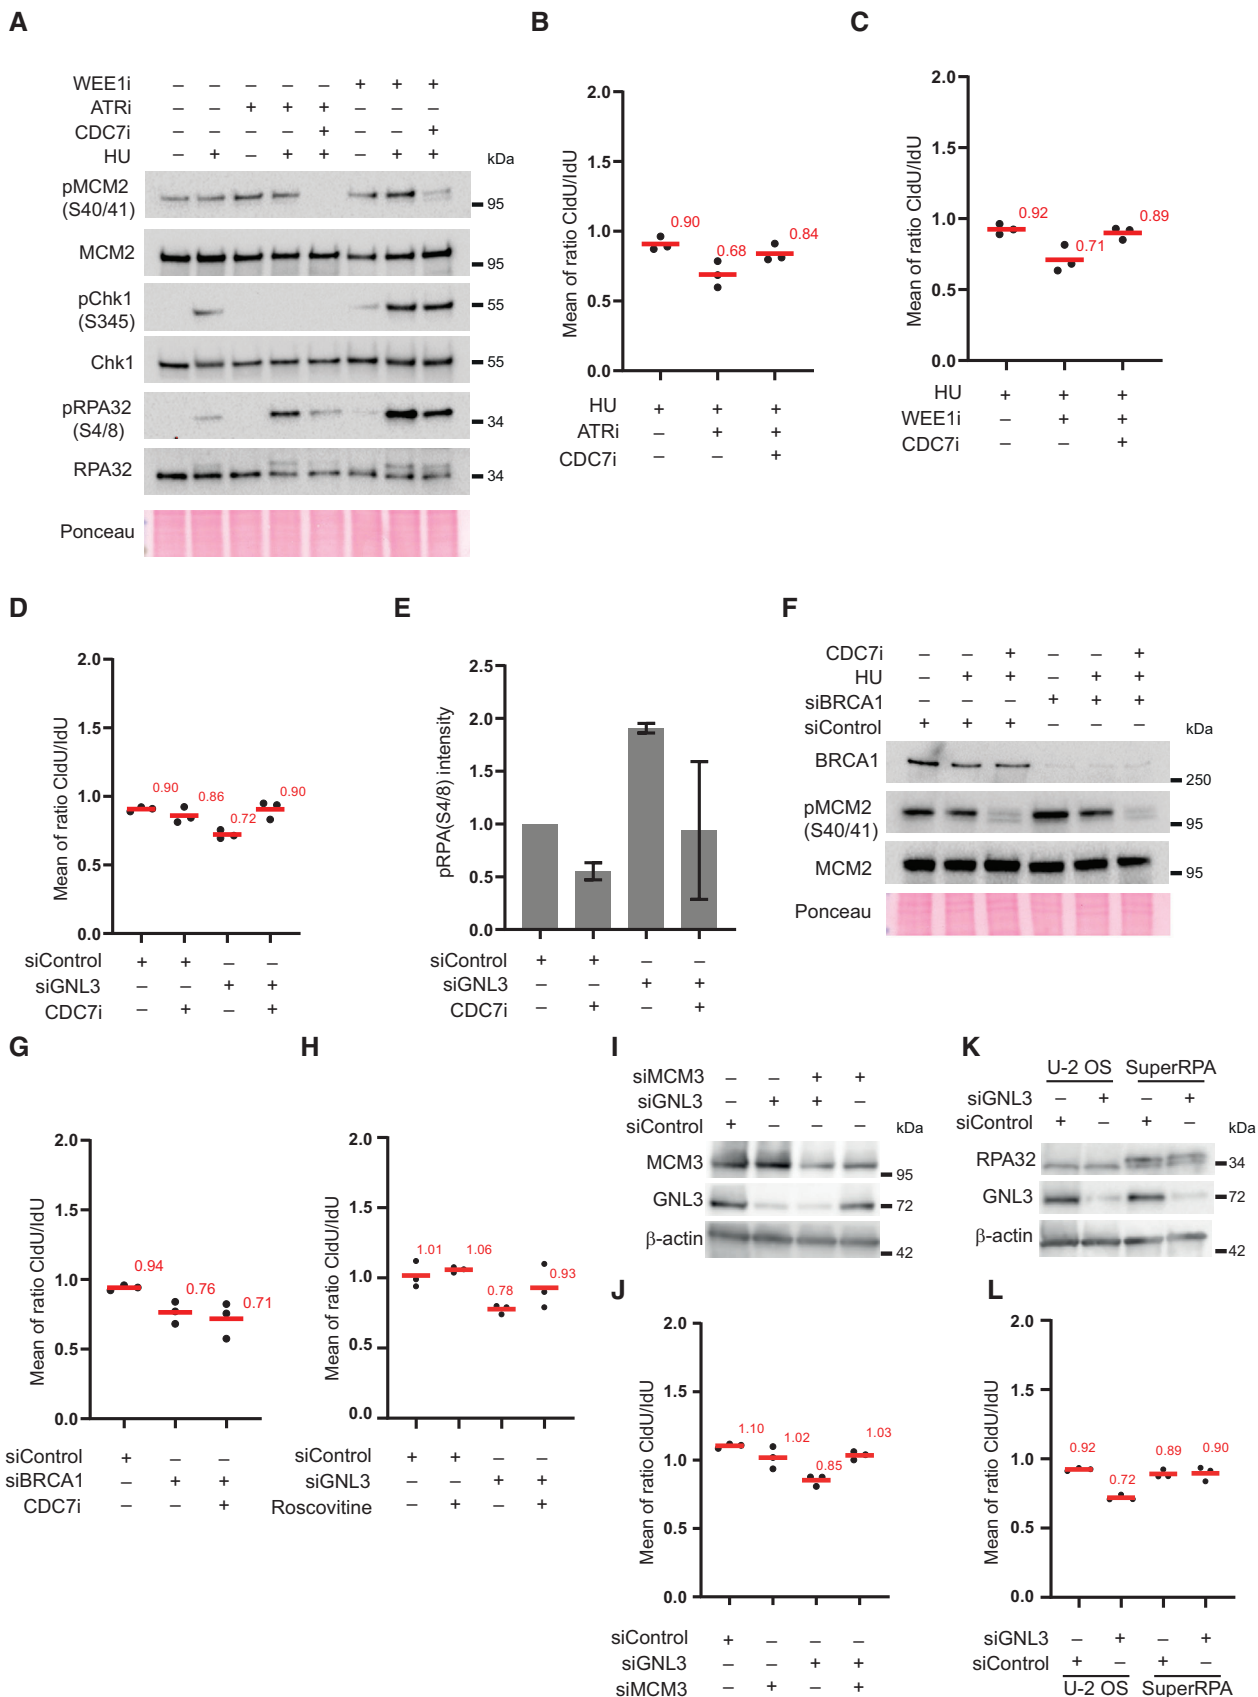

Figure EV3.

**Figure EV4. GNL3 interacts with ORC2 in the nucleolus (related to Fig 4).**

- A Immunofluorescence experiment in Flp-In T-Rex HEK293 cells showing the expression of GNL3-BirA-FLAG and the biotinylation by BirA (revealed by streptavidin coupled with Alexa-488) upon addition of biotin.
- B Common hits found by mass spectrometry between ORC2 immunoprecipitation and GNL3 BioID. The localization was determined using The Human Protein Atlas database (<https://www.proteinatlas.org/>).
- C Examples of GNL3 peaks on chromosome 19 obtained by ChIP-seq of GNL3, INPUT is shown as negative control. The ORC2 ChIP-seq data are obtained from (Miotto et al, 2016).
- D PLA (proximity ligation assay) analyzing the proximity between ORC2 and GNL3 in HeLa S3 cells.
- E PLA (proximity ligation assay) analyzing the proximity between GNL3 and CENP-A in HeLa S3 cells.

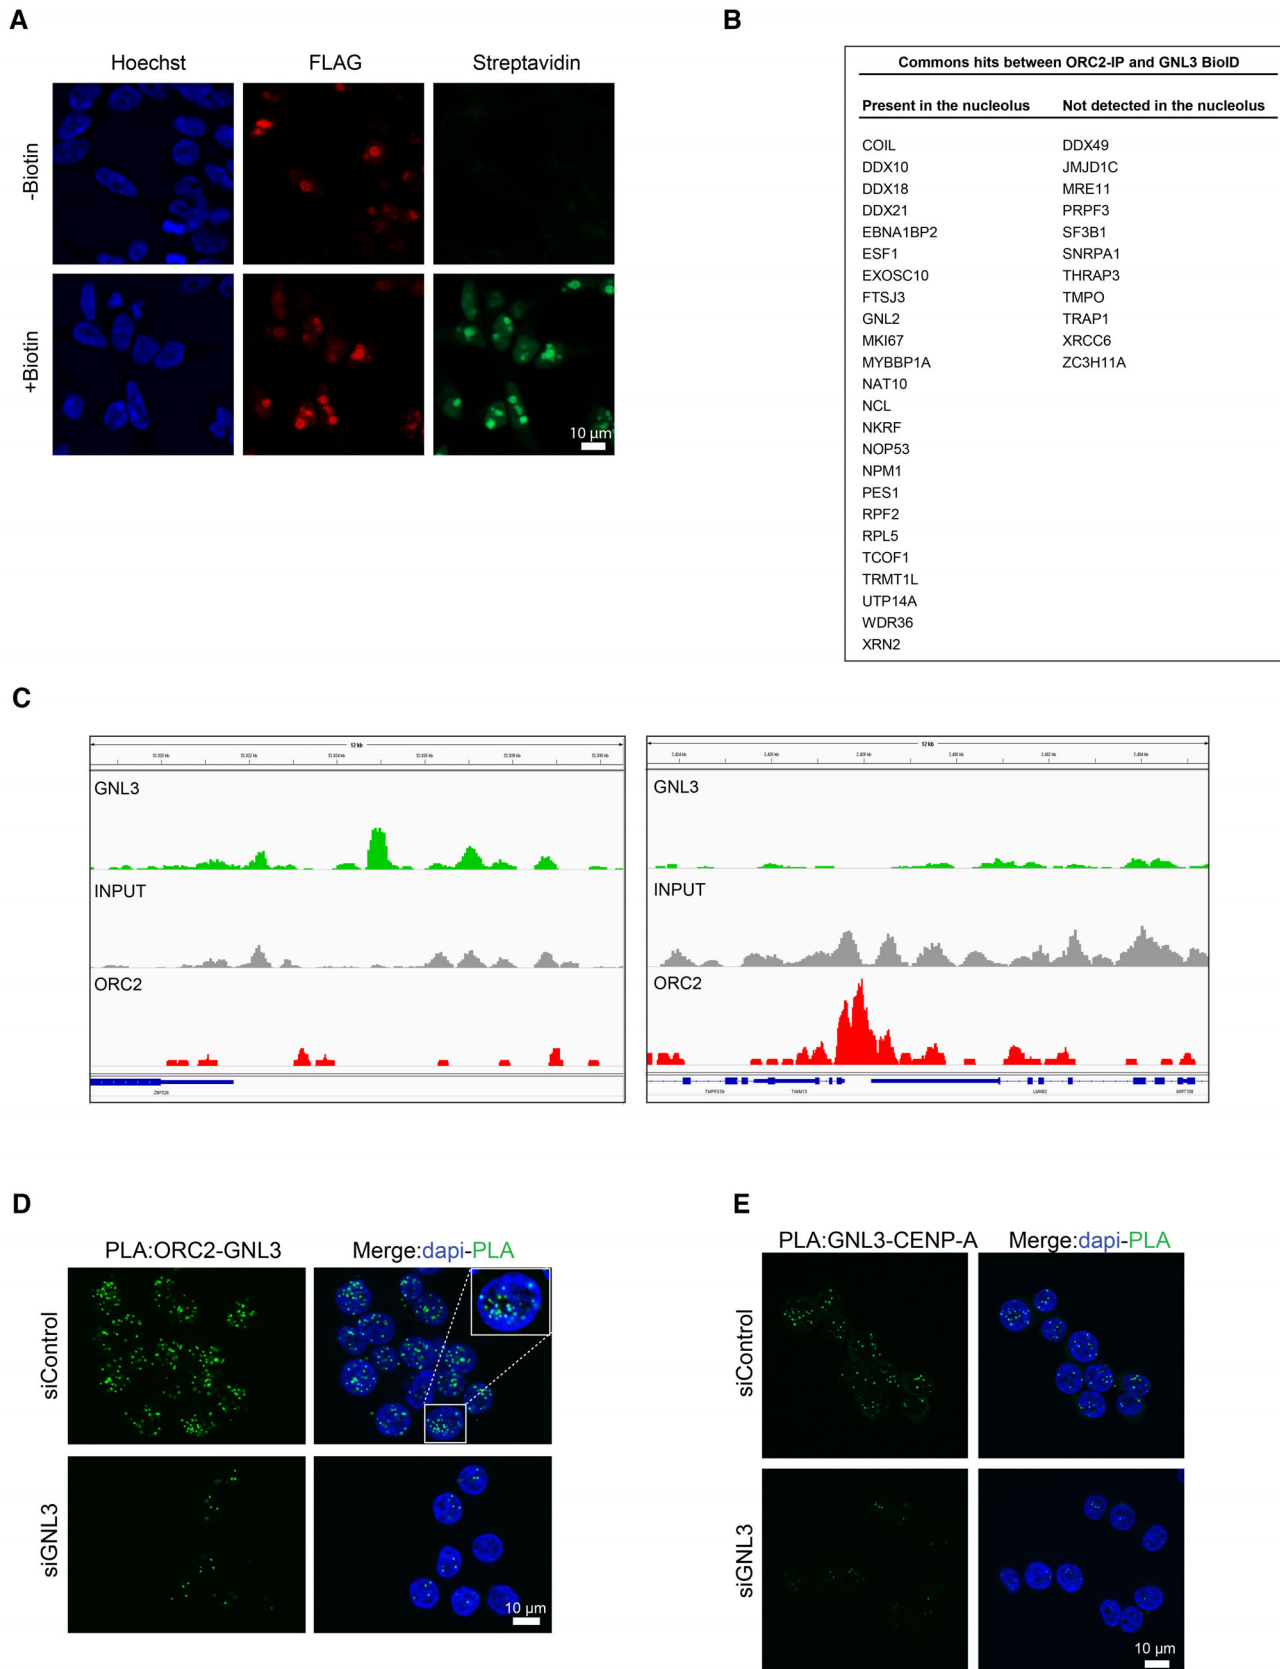

Figure EV4.



**Figure EV5. Accumulation of GNL3 into the nucleolus limits origin firing (related to Figs 5 and 6).**

- A PLA (proximity ligation assay) analyzing the proximity between ORC2 and GNL3-WT-FLAG or GNL3-dB-FLAG in HeLa Flp-In cells upon doxycycline induction using the indicated antibodies.
- B PLA (proximity ligation assay) analyzing the proximity between ORC2 and GNL3-dB-FLAG in HeLa Flp-In cells upon doxycycline induction using the indicated antibodies.
- C Biological replicate of the GIFD (Global Instant Fork Density) analysis performed in Fig 5G. GIFD value is indicated in red.
- D Graphic representation (related to Fig 6A) of the medians of CldU/IdU ratios in three biological replicates, the average is indicated in red.
- E Graphic representation (related to Fig 6B) of the medians of CldU/IdU ratios in three biological replicates, the average is indicated in red.
- F Western-blot analysis of Flp-In T-Rex HeLa cells expressing exogenous GNL3-WT or GNL3-dB mutants. Cells were transfected with siControl or siGNL3 for 48 h then the expression of GNL3-WT and GNL3-dB (resistant to the siRNA against GNL3) was induced using the indicated doses of doxycycline for 16 h.
- G Immunofluorescence analysis of Flp-in T-Rex HeLa cells expressing GNL3-dB at the indicated doses of doxycycline.
- H Graphic representation (related to Fig 6C) of the medians of CldU/IdU ratios in three biological replicates, the average is indicated in red.
- I Immunofluorescence experiment using the indicated antibodies of Flp-in T-Rex HeLa cells expressing or not exogenous FLAG-ORC2.
- J Graphic representation (related to Fig 6E) of the medians of CldU/IdU ratios in three biological replicates, the average is indicated in red.

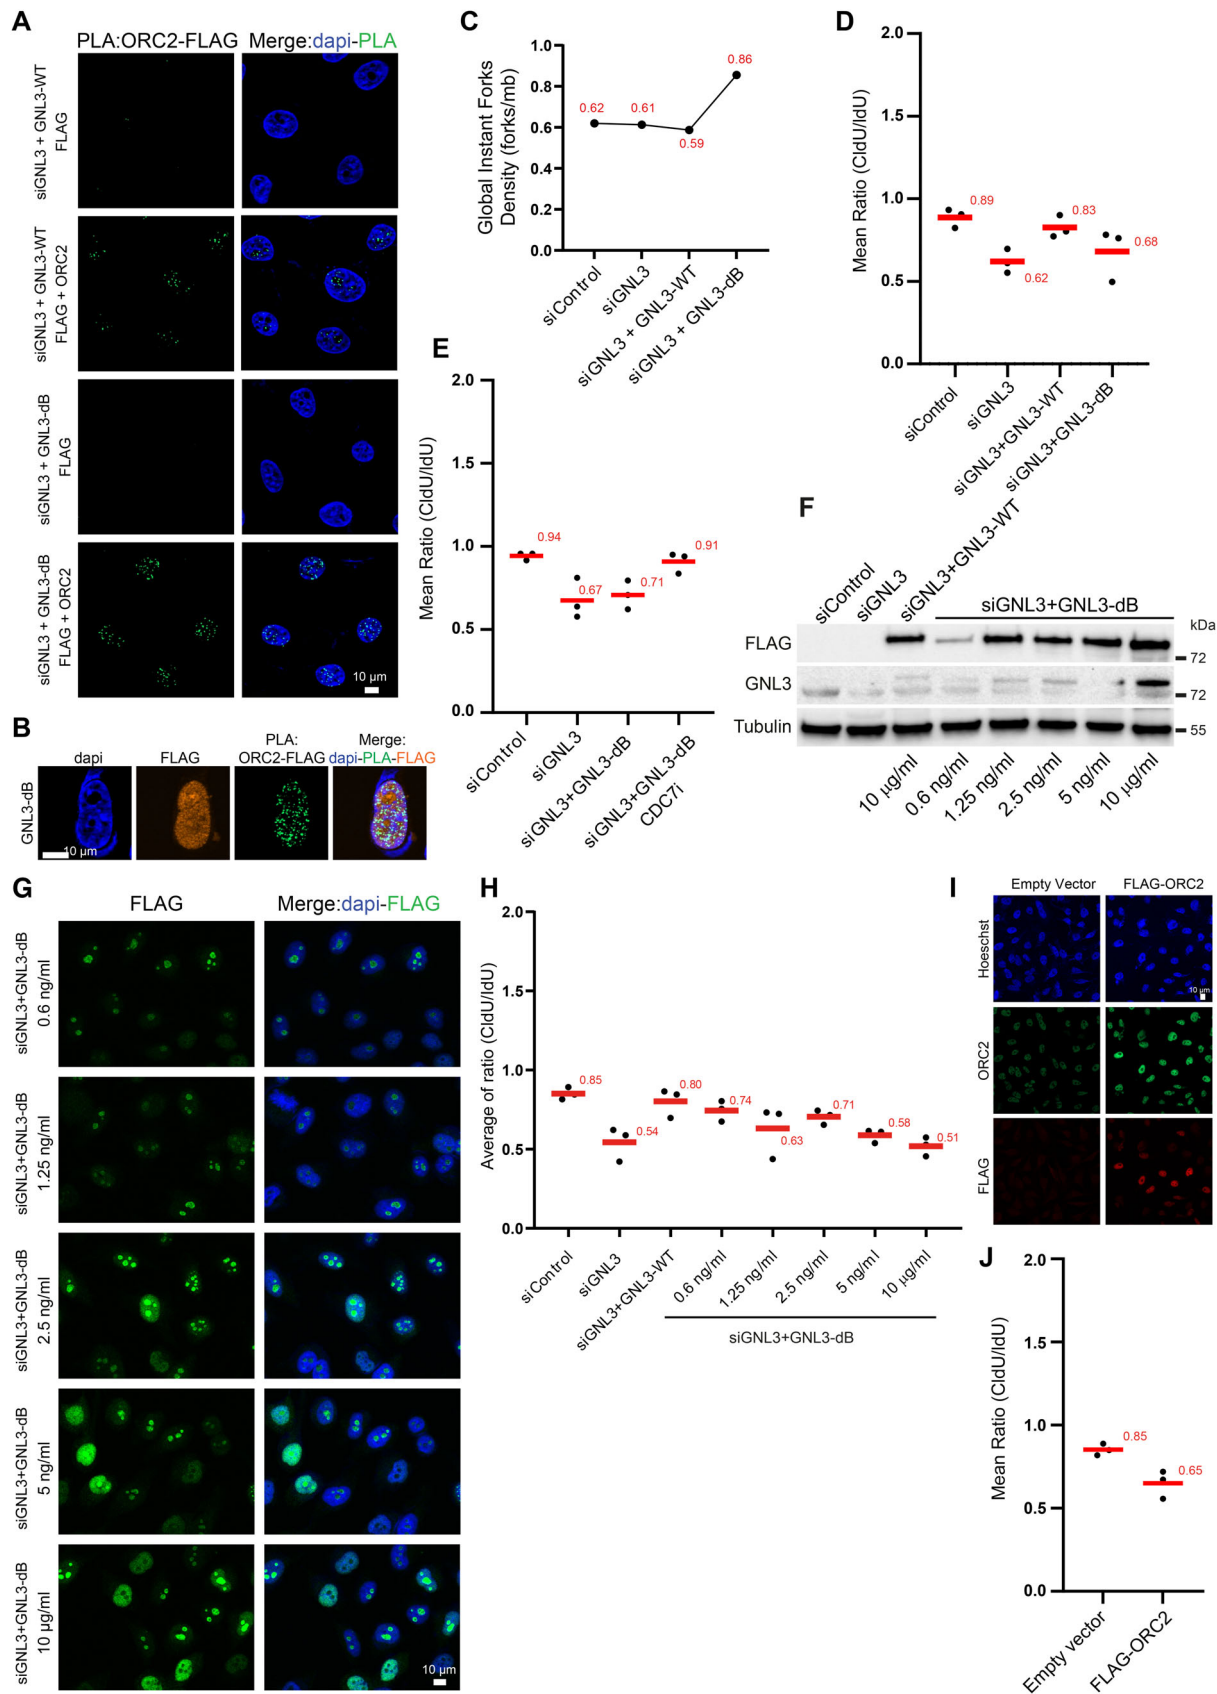

Figure EV5.
